# Supplementary material
Source: HighWire-hosted journal article supplement (https://bmjopen.bmj.com/content/6/12/e011988)
Supplement: inline-supplementary-material-1 [file inline-supplementary-material-1.pdf]

**Online Appendix**

| <b>Interviewee</b> | <b>Profession</b>    | <b>Treating practitioner</b> |
|--------------------|----------------------|------------------------------|
| 1                  | Psychiatrist         | Yes                          |
| 2                  | Psychologist         | Yes                          |
| 3                  | Psychiatrist         | Yes                          |
| 4                  | Lawyer               | No                           |
| 5                  | Physician            | Yes                          |
| 6                  | Psychologist         | Yes                          |
| 7                  | Psychiatrist         | Yes                          |
| 8                  | General practitioner | Yes                          |
| 9                  | Nurse                | No                           |
| 10                 | Surgeon              | Yes                          |
| 11                 | General practitioner | Yes                          |
| 12                 | Lawyer               | No                           |
| 13                 | Junior doctor        | Yes                          |
| 14                 | Lawyer               | No                           |
| 15                 | General practitioner | Yes                          |
| 16                 | Physician            | Yes                          |
| 17                 | Nurse                | Yes                          |
| 18                 | Emergency medicine   | Yes                          |
| 19                 | Psychiatrist         | Yes                          |
| 20                 | Emergency medicine   | Yes                          |
| 21                 | Psychologist         | Yes                          |
| 22                 | Surgeon              | Yes                          |
